# Supplementary material
Source: PubMed Central journal article supplement (PMC4955741)
Supplement: NIHMS791535-supplement-1.pdf [file NIHMS791535-supplement-1.pdf]

**Supplementary table 1.** ChIP-qPCR average Ct values (n = 3 to 5)

| Transcription factor | Promoter   | T <sub>REG</sub> |      | Naive |      |
|----------------------|------------|------------------|------|-------|------|
|                      |            | Input            | ChIP | Input | ChIP |
| NFκB p65             | IFN-γ      | 35.9             | 30.2 | 33.5  | 27.8 |
|                      | IL-10      | 38.4             | 33.1 | 37.7  | 31.2 |
|                      | T-bet      | 38.3             | 31.5 | 34.5  | 29.1 |
|                      | Eomes-1    | 26.2             | 25.8 | 25.9  | 25.4 |
|                      | Eomes-2    | 36.9             | 26.5 | 34.9  | 25.1 |
|                      | Eomes-3    | 33.0             | 25.6 | 33.0  | 24.0 |
|                      | Arf2       | 31.4             | 25.6 | 32.4  | 24.2 |
| T-bet                | IFN-γ -22K | 33.6             | 25.3 | 35.0  | 26.2 |
|                      | IFN-γ -34K | 28.8             | 23.7 | 29.3  | 23.8 |
|                      | IL-10      | 37.4             | 30.4 | 37.5  | 28.9 |
|                      | Arf2       | 35.9             | 30.1 | 36.6  | 28.8 |
| Eomes                | IFN-γ -22K | 33.6             | 26.7 | 35.0  | 27.9 |
|                      | IFN-γ -34K | 28.8             | 24.6 | 29.3  | 25.5 |
|                      | IL-10      | 37.4             | 31.6 | 37.5  | 30.6 |
|                      | Arf2       | 35.9             | 31.6 | 36.5  | 30.6 |
